# Supplementary material for: Directional Topography Influences Adipose Mesenchymal Stromal Cell Plasticity: Prospects for Tissue Engineering and Fibrosis
Source: Hindawi journal article supplement (doi:10.1155/2019/5387850), 2019-05-05
Supplement: f1 [file 5387850.f1.pdf]

**SUPPLEMENTARY MATERIAL**

| <b>Supplementary Table S1. Primer sequences of genes</b> |                                  |                           |
|----------------------------------------------------------|----------------------------------|---------------------------|
| <b>Gene</b>                                              | <b>Primer Sequence (5' – 3')</b> |                           |
| <b><i>B2M</i></b>                                        | F                                | TGCTGTCTCCATGTTTGATGTATCT |
|                                                          | R                                | TCTCTGCTCCCCACCTCTAAGT    |
| <b><i>GAPDH</i></b>                                      | F                                | AGCCACATCGCTCAGACAC       |
|                                                          | R                                | GCCCAATACGACCAAATCC       |
| <b><i>ACTA2</i></b>                                      | F                                | CTGTTCCAGCCATCCTTCAT      |
|                                                          | R                                | TCATGATGCTGTTGTAGGTGGT    |
| <b><i>TAGLN</i></b>                                      | F                                | CAAAGCCATCAGGGTCCTC       |
|                                                          | R                                | TTCCAGACTGTTGACCTCTTTG    |
